# Supplementary material for: Layerwise replacement method to achieve high solar-to-hydrogen efficiency for photocatalytic water splitting: a first principles study
Source: Royal Society of Chemistry journal article supplement (doi:10.1039/d4cy00688g), 2024-01-01
Supplement: d4cy00688g1.pdf [file d4cy00688g1.pdf]

## Supporting Information

# Layerwise Replacement Method to Achieve High Solar-to-Hydrogen efficiency for Photocatalytic Water Splitting: A First Principles Study

Chuye Quan,<sup>a,b</sup> Shilei Ji,<sup>a</sup> Ruijia Yao,<sup>a</sup> Ming Du,<sup>a</sup> Chen Chen,<sup>c</sup> Xiaoyang He,<sup>c</sup> Ran Cai,<sup>d</sup> Jianping Yang<sup>c</sup> and Xing'ao Li<sup>a,c</sup>

<sup>a</sup> Institute of Advanced Materials (*IAM*), Nanjing University of Posts & Telecommunications (*NJUPT*), Nanjing 210023, China

<sup>b</sup> Tongda College, Nanjing University of Posts and Telecommunications, Yangzhou 225100, China

<sup>c</sup> School of Science, Jiangsu Provincial Engineering Research Center of Low Dimensional Physics and New Energy, Nanjing University of Posts and Telecommunications (*NJUPT*), Nanjing 210023, China

<sup>d</sup> School of Medical Technology, Beijing Institute of Technology

## Computational details

DFT-1/2 is based on Slater's half-occupation technique, with the -1/2 denoting an intermediate position between the initial ground state and the ionized state.<sup>1-2</sup> The DFT-1/2 method introduces the computed atomic self-energy potential into solids, where it is incorporated into the pseudopotential as a common pseudopotential for calculating electronic structures.<sup>3-4</sup> The self-energy potential requires correction before its introduction. The self-energy potential's reach is primarily constrained by the cutoff radius  $r_{\text{cut}}$ . The potential is trimmed by a function as

$$\Theta = \begin{cases} \left[1 - \left(\frac{r}{CUT}\right)^n\right]^3, & r \leq CUT \\ 0, & r > CUT \end{cases} \quad \text{S(1)}$$

Since  $r_{\text{cut}}$  is variable, selecting an appropriate value for  $r_{\text{cut}}$  results in the maximum presentation of the bandgap, where the correction is maximized. In this work, we determine the appropriate  $r_{\text{cut}}$  for the atoms through testing. We set the parameter  $n$  to 8, a value also used in other articles.

The formation energy of all the structures are evaluated by the following formula:

$$E_f = \frac{E_{total} - \sum_i n_i \mu_i}{\sum_i n_i} \quad \text{S (2)}$$

where  $E_{total}$  and  $n_i$  represent the total energy and the number of  $i$ -th atom of the structures in a unit cell, and  $\mu_i$  is the cohesive energy of the  $i$ -th atom in its bulk crystal.

The calculation formula of plane-averaged charge density differences  $\Delta\rho_{(z)}$  is as follow:

$$\Delta\rho_{(z)} = \rho_{Al_2S_2Se-t} - \rho_{Al} - \rho_S - \rho_{Se} \quad \text{S (3)}$$

$$\Delta\rho_{(z)} = \rho_{Al_2TeSe_2-t} - \rho_{Al} - \rho_{Te} - \rho_{Se} \quad \text{S (4)}$$

The formula for calculating the photoabsorption coefficient ( $\alpha_\omega$ ), denoted as (S5), incorporates the frequency ( $\omega$ ), with  $\varepsilon'(\omega)$  and  $\varepsilon''(\omega)$  representing the real and imaginary parts of the dielectric function, respectively. These parameters were obtained using the HSE06 hybrid functional.

$$\alpha_{\omega} = \frac{\sqrt{2}\omega}{2} \left[ \sqrt{(\varepsilon'(\omega))^2 + (\varepsilon''(\omega))^2} - \varepsilon'(\omega) \right]^{1/2} \quad \text{S (5)}$$

The Gibbs free energy change ( $\Delta G$ ) in the water redox reactions is defined as:

$$\Delta G = \Delta E + \Delta E_{ZPE} - T\Delta S \quad \text{S (6)}$$

where  $\Delta E$ ,  $\Delta E_{ZPE}$ , and  $\Delta S$  represent the energy difference of adsorption, zero-point energy and entropy, respectively. T is system temperature (298 K).

The OWS process comprises two half-reactions: HER, which involves a two-electron reaction, and OER, which is a four-electron reaction in an acidic solution. The OER process can be written as:

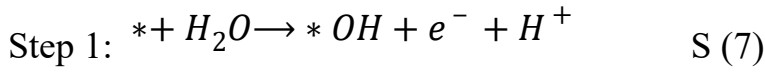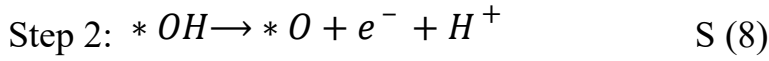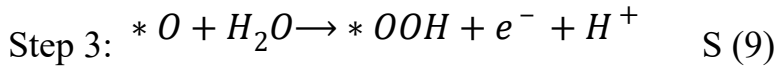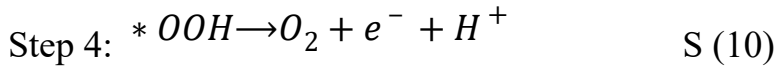

The HER process can be described as:

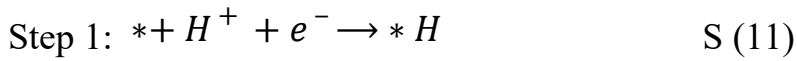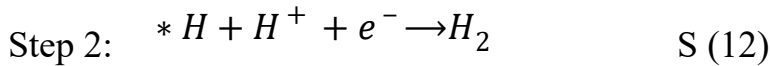

Then, the  $\Delta G$  for OER are achieved as:

$$\text{Step 1: } \Delta G = G_{*OH} + \frac{1}{2}G_{H_2} - G_{H_2O} - G_* - U_h \quad \text{S (13)}$$

$$\text{Step 2: } \Delta G = G_{*O} + \frac{1}{2}G_{H_2} - G_{*OH} - U_h \quad \text{S (14)}$$

$$\text{Step 3: } \Delta G = G_{*OOH} + \frac{1}{2}G_{H_2} - G_{H_2O} - G_{*O} - U_h \quad \text{S (15)}$$

$$\text{Step 4: } \Delta G = G_{*} + \frac{1}{2}G_{H_2} + G_{*O} - G_{*OOH} - U_h \quad \text{S (16)}$$

The  $\Delta G$  for HER is calculated by:

$$\Delta G = G_{*H} - \frac{1}{2}G_{H_2} - G_{*} - U_e \quad \text{S (17)}$$

the  $\mu_\alpha$  of 2D materials can be expressed as the following equation: <sup>5-6</sup>

$$\mu_\alpha = \frac{e\hbar^3 C_\alpha}{k_B T |m_\alpha^*| m_d (E_\alpha^l)^2} \quad \text{S (18)}$$

$$C_\alpha = \frac{2 \partial^2 E_{total}}{S_0 \partial (\Delta l_\alpha / l_\alpha^0)^2} \quad \text{S (19)}$$

$$E_\alpha^l = \frac{\Delta E_{ks}}{\Delta l_\alpha / l_\alpha^0} \quad \text{S (20)}$$

Here,  $e$  denotes the electron charge,  $\hbar$  represents the reduced Planck constant,  $k_B$  stands for the Boltzmann constant,  $T$  denotes the temperature (set to  $T = 300\text{K}$ ),  $m_\alpha^*$  corresponds to the effective mass in the  $\alpha$  direction of the material without strain (where  $\alpha$  is either the  $x$  or  $y$  direction),  $m_d$  is the average effective mass ( $m_d = \sqrt{m_x^* m_y^*}$ ).  $C_\alpha$  denotes the elastic modulus, with  $S_0$  represents the area of the optimized 2D unit cell without strain,  $E_{total}$  represents the total energy of the system,  $l_\alpha^0$  corresponds to the lattice constant without strain, and  $\Delta l_\alpha$  signifies the change in lattice constant. The deformation potential is calculated as S (18).

## Other supplementary contents

The HSE06 Hybrid functionals typically yield more accurate bandgaps, but their computational demands are higher.<sup>1</sup> The DFT-1/2 method, introduced in recent years as a correction function for DFT, mitigates the problem of underestimated bandgaps in standard DFT by rectifying the self-energy of valence band holes, all while maintaining rapid computational speed.<sup>3, 7</sup> Previously, DFT-1/2 has successfully predicted the bandgaps of various semiconductor materials, ranging from metal oxides to halide perovskites, with accuracy comparable to GW but at lower computational cost.<sup>8</sup> In this work, the computational results indicate that, except for  $\text{Al}_2\text{S}_2\text{Te-t}$  and  $\text{Al}_2\text{TeS}_2\text{-m}$ , the  $E_g$  of other materials calculated with PBE are approximately 0.8 eV smaller than those obtained with HSE06, while the difference between the HSE06 band gap and the DFT-1/2 corrected  $E_g$  is around 0.2 eV. Considering the fast computation speed and extremely low cost of the DFT-1/2 method, for large systems with similar structures, we can use the DFT-1/2 method to evaluate the  $E_g$ . The significant difference in  $E_g$  predicted for  $\text{Al}_2\text{S}_2\text{Te-t}$  and  $\text{Al}_2\text{TeS}_2\text{-m}$  monolayers using the HSE06 and DFT-1/2 methods may be due to their metallic nature as predicted by PBE.

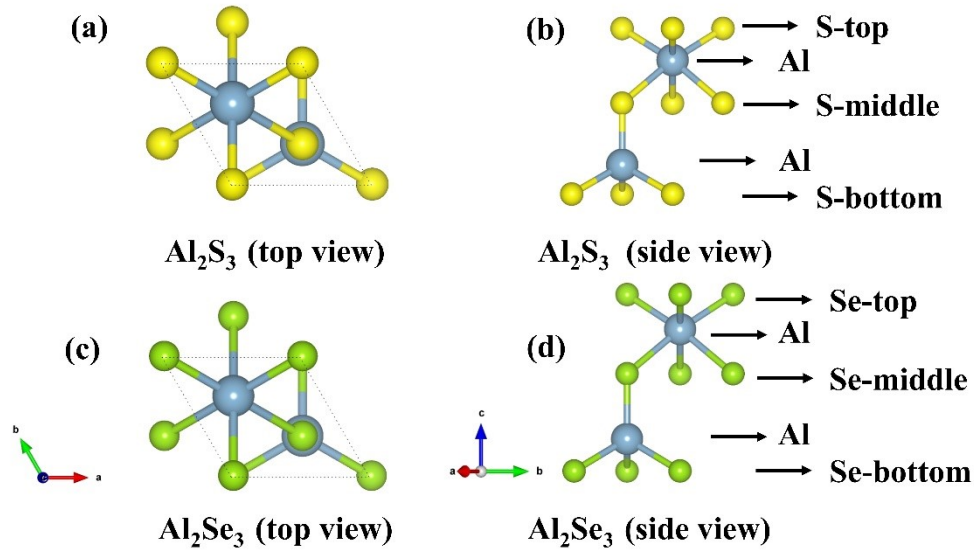

Fig. S1. The unit cells of  $\text{Al}_2\text{S}_3$  and  $\text{Al}_2\text{Se}_3$  monolayers.

Tab. S1. The lattice constant ( $a$ ), formation energy ( $E_f$ ), band gap ( $E_g$ ), and electrostatic potential difference ( $\Delta\Phi$ ) of other 10 types of  $\text{Al}_2\text{X}_2\text{X}'$  monolayers except for  $\text{Al}_2\text{S}_2\text{Se-t}$  and  $\text{Al}_2\text{TeSe}_2\text{-m}$ .

|                                     | $a(\text{\AA})$ | $E_f$<br>(eV/atom) | $E_g$ (eV)/<br>PBE | $E_g$ (eV)/<br>DFT-1/2 | $E_g$ (eV)/<br>HSE06 | $\Delta\Phi$ |
|-------------------------------------|-----------------|--------------------|--------------------|------------------------|----------------------|--------------|
| $\text{Al}_2\text{S}_2\text{Te-t}$  | 3.750           | -0.896             | —                  | 0.211                  | 1.195                | 0.165        |
| $\text{Al}_2\text{TeS}_2\text{-m}$  | 3.70            | -0.841             | —                  | 0.829                  | 0.403                | 1.892        |
| $\text{Al}_2\text{S}_2\text{Te-b}$  | 3.774           | -0.864             | 1.791              | 2.415                  | 2.465                | 2.285        |
| $\text{Al}_2\text{S}_2\text{Se-t}$  | 3.638           | -1.108             | 1.154              | 2.091                  | 1.839                | 2.230        |
| $\text{Al}_2\text{SeS}_2\text{-m}$  | 3.618           | -1.084             | 1.427              | 2.178                  | 2.202                | 2.202        |
| $\text{Al}_2\text{S}_2\text{Se-b}$  | 3.640           | -1.096             | 2.431              | 3.360                  | 3.255                | 2.287        |
| $\text{Al}_2\text{Se}_2\text{S-t}$  | 3.692           | -1.009             | 1.813              | 2.653                  | 2.575                | 2.123        |
| $\text{Al}_2\text{SSe}_2\text{-m}$  | 3.716           | -1.035             | 1.679              | 2.595                  | 2.361                | 2.109        |
| $\text{Al}_2\text{Se}_2\text{S-b}$  | 3.691           | -1.020             | 1.237              | 2.219                  | 1.973                | 2.075        |
| $\text{Al}_2\text{Se}_2\text{Te-t}$ | 3.891           | -0.795             | 0.253              | 1.050                  | 0.807                | 1.584        |
| $\text{Al}_2\text{TeSe}_2\text{-m}$ | 3.854           | -0.762             | 0.522              | 1.323                  | 1.157                | 1.714        |
| $\text{Al}_2\text{Se}_2\text{Te-b}$ | 3.900           | -0.779             | 1.959              | 2.377                  | 2.728                | 1.999        |

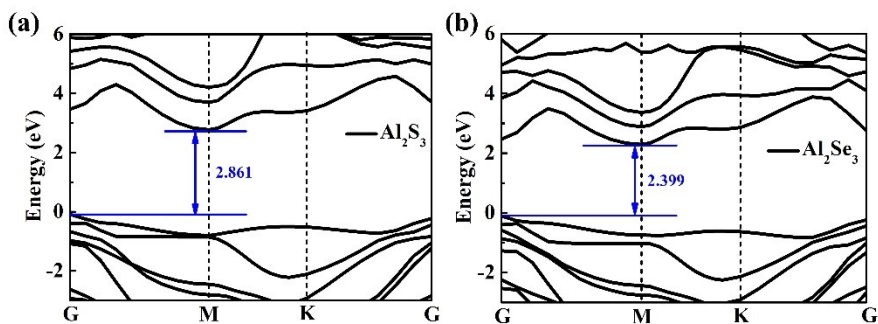

Fig. S2. The electronic band structures of  $\text{Al}_2\text{S}_3$  and  $\text{Al}_2\text{Se}_3$  monolayers at the HSE06 level.

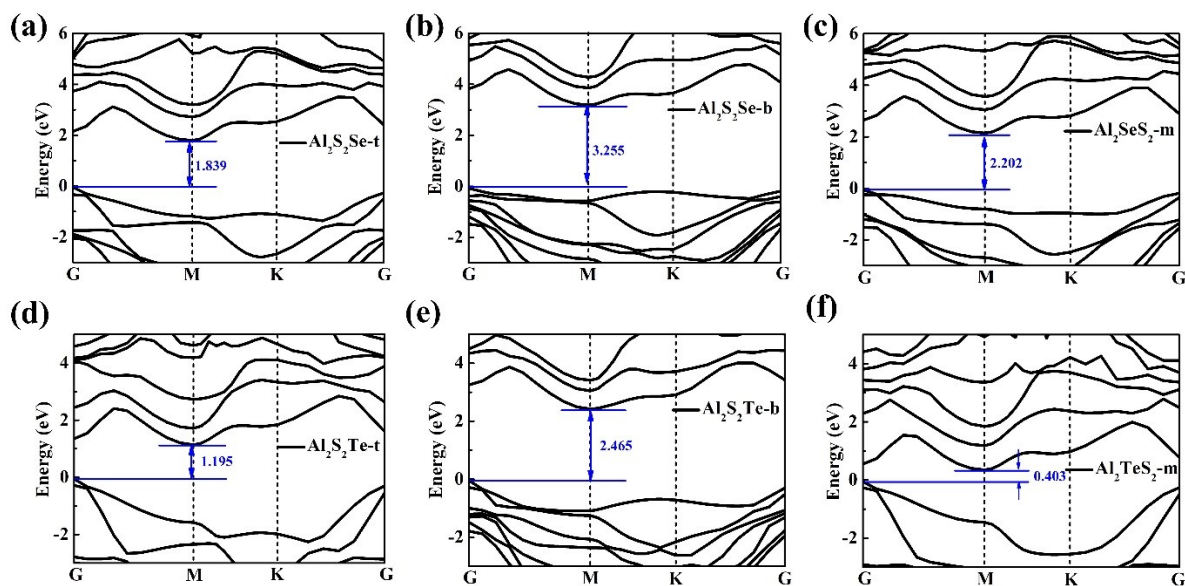

Fig. S3 (a-f). The electronic band structures of  $\text{Al}_2\text{S}_2\text{Se-t}$ ,  $\text{Al}_2\text{S}_2\text{Se-b}$ ,  $\text{Al}_2\text{SeS}_2\text{-m}$ ,  $\text{Al}_2\text{S}_2\text{Te-t}$ ,  $\text{Al}_2\text{S}_2\text{Te-b}$  and  $\text{Al}_2\text{TeS}_2\text{-m}$  monolayers at the HSE06 level.

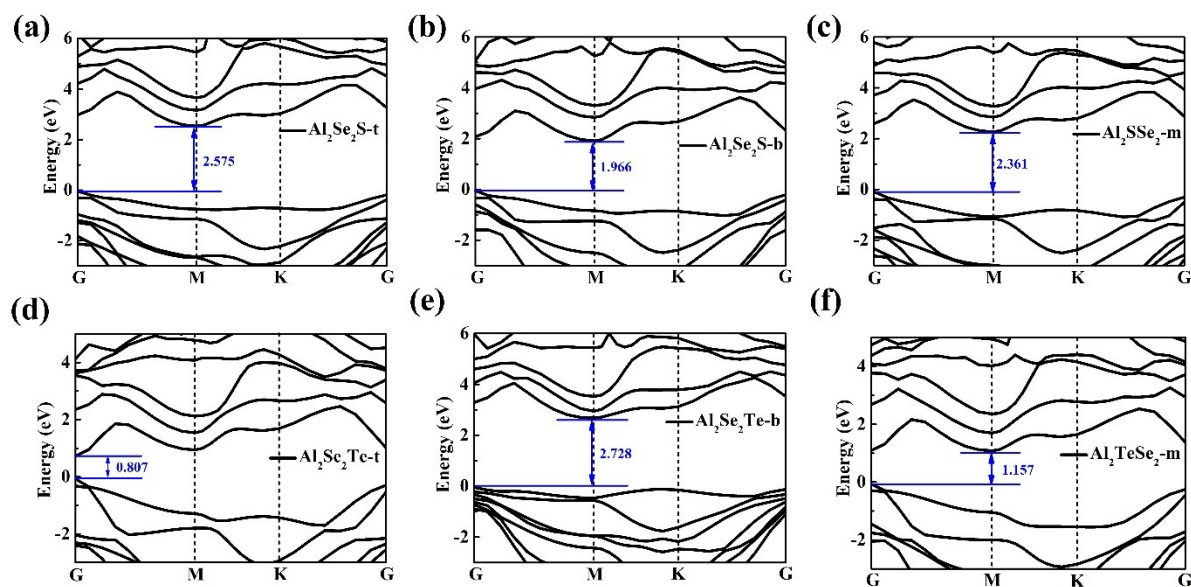

Fig. S4 (a-f). The electronic band structures of  $\text{Al}_2\text{Se}_2\text{S-t}$ ,  $\text{Al}_2\text{Se}_2\text{S-b}$ ,  $\text{Al}_2\text{SSe}_2\text{-m}$ ,  $\text{Al}_2\text{Se}_2\text{Te-t}$ ,  $\text{Al}_2\text{Se}_2\text{Te-b}$  and  $\text{Al}_2\text{TeSe}_2\text{-m}$  monolayers at the HSE06 level.

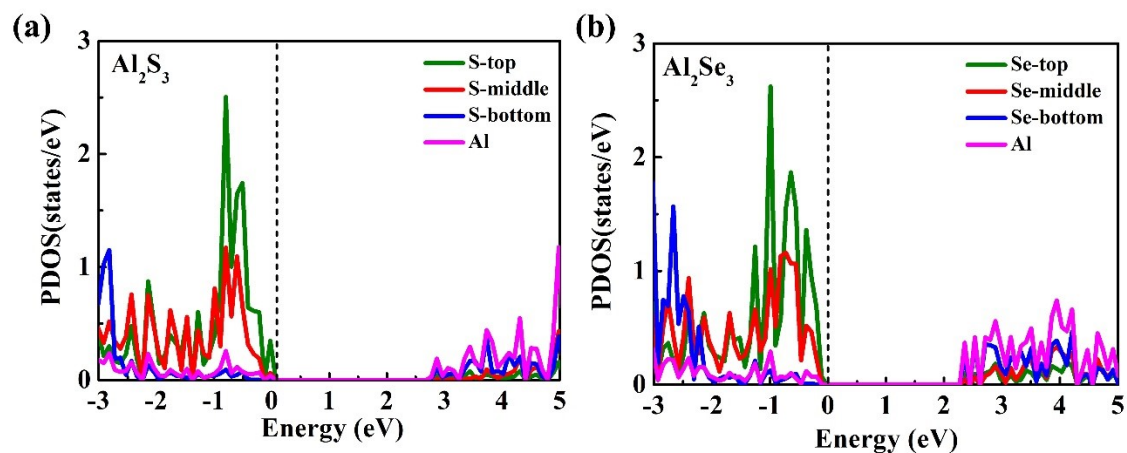

Fig. S5 (a-b) The PDOS of  $\text{Al}_2\text{S}_3$  and  $\text{Al}_2\text{Se}_3$  monolayers at the HSE06 level

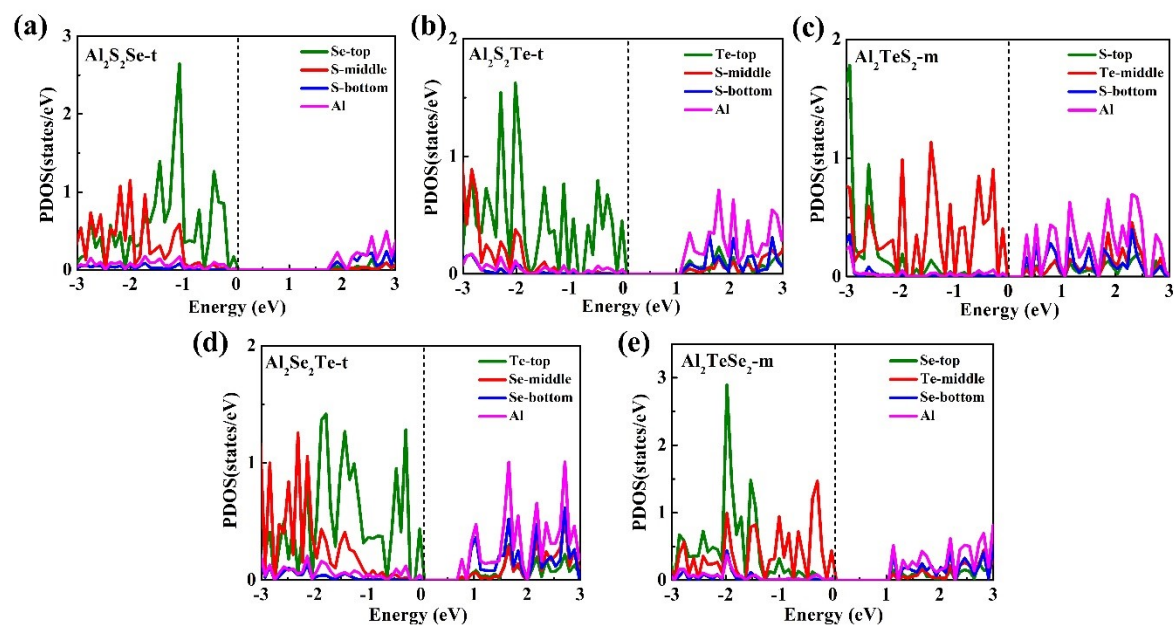

Fig. S6 (a-e) The PDOS of  $\text{Al}_2\text{S}_2\text{Se-t}$ ,  $\text{Al}_2\text{S}_2\text{Te-t}$ ,  $\text{Al}_2\text{TeS}_2\text{-m}$ ,  $\text{Al}_2\text{Se}_2\text{Te-t}$  and  $\text{Al}_2\text{TeSe}_2\text{-m}$  monolayers at the HSE06 level.



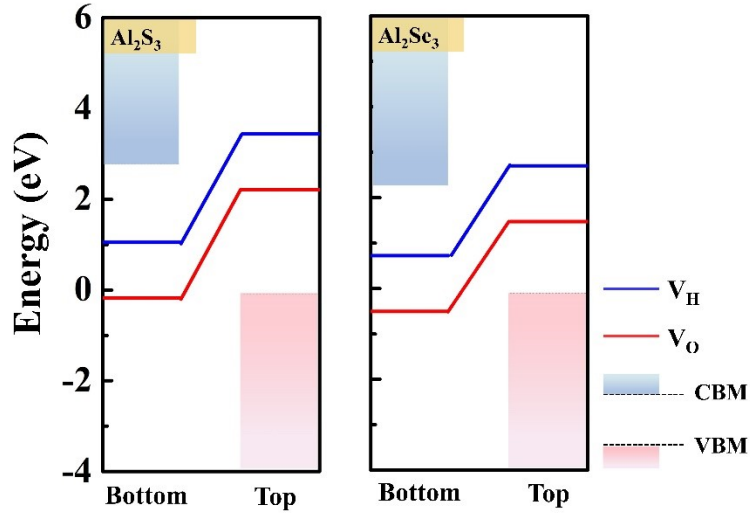

Fig. S7. The band alignment relative to the water redox potentials for  $\text{Al}_2\text{S}_3$  and  $\text{Al}_2\text{Se}_3$  monolayers.

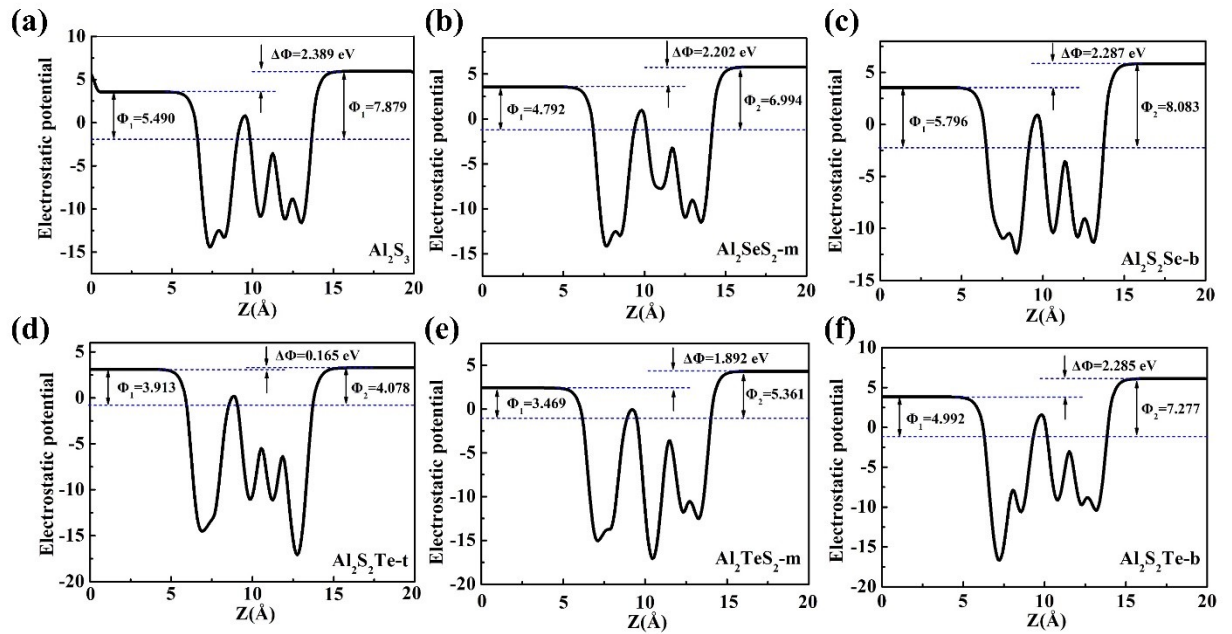

Fig. S8. The electrostatic potentials, Fermi level and work functions of  $\text{Al}_2\text{S}_3$ ,  $\text{Al}_2\text{SeS}_2\text{-m}$ ,  $\text{Al}_2\text{S}_2\text{Se-b}$ ,  $\text{Al}_2\text{S}_2\text{Te-t}$ ,  $\text{Al}_2\text{TeS}_2\text{-m}$  and  $\text{Al}_2\text{S}_2\text{Te-b}$  monolayers along the Z-direction.

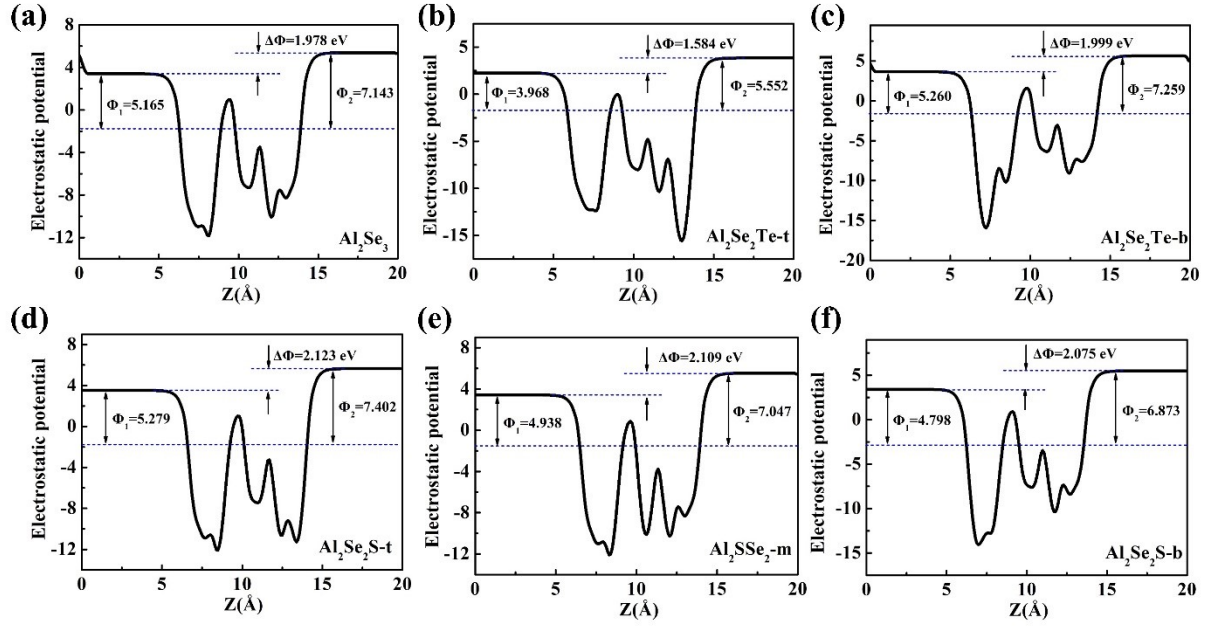

Fig. S9. The electrostatic potentials, Fermi level and work functions of  $\text{Al}_2\text{Se}_3$ ,  $\text{Al}_2\text{Se}_2\text{Te-t}$ ,  $\text{Al}_2\text{Se}_2\text{Te-b}$ ,  $\text{Al}_2\text{Se}_2\text{S-t}$ ,  $\text{Al}_2\text{SSe}_2\text{-m}$  and  $\text{Al}_2\text{Se}_2\text{S-b}$  monolayers along the Z-direction.

Table S2. The overpotentials  $\chi(\text{H}_2)$  and  $\chi(\text{O}_2)$ , energy conversion efficiency of light absorption ( $\eta_{abs}$ ), carrier utilization efficiency ( $\eta_{cu}$ ), STH efficiency ( $\eta_{STH}$ ), and corrected STH ( $\eta'_{STH}$ ).

|                                     | $\chi_{\text{H}_2}$ | $\chi_{\text{O}_2}$ | $\eta_{abs}$ | $\eta_{cu}$ | $\eta_{STH}$ | $\eta'_{STH}$ |
|-------------------------------------|---------------------|---------------------|--------------|-------------|--------------|---------------|
| $\text{Al}_2\text{S}_3$             | 1.723               | 2.297               | 8.5%         | 38.5%       | 3.3%         | 3.1%          |
| $\text{Al}_2\text{Se}_3$            | 1.570               | 1.577               | 21.0%        | 43.6%       | 9.2%         | 8.0%          |
| $\text{Al}_2\text{S}_2\text{Te-t}$  | 1.668               | -1.538              | 76.6%        | 1.2%        | 0.9%         | 0.9%          |
| $\text{Al}_2\text{TeS}_2\text{-m}$  | 1.320               | -0.255              | 99.3%        | 46.0%       | 45.7%        | 20.2%         |
| $\text{Al}_2\text{S}_2\text{Te-b}$  | 1.870               | 1.650               | 18.9%        | 42.9%       | 8.1%         | 7.0%          |
| $\text{Al}_2\text{S}_2\text{Se-t}$  | 1.664               | 1.176               | 44.2%        | 51.6%       | 22.8%        | 16.1%         |
| $\text{Al}_2\text{SeS}_2\text{-m}$  | 1.729               | 1.382               | 28.2%        | 46.2%       | 13.0%        | 10.5%         |
| $\text{Al}_2\text{S}_2\text{Se-b}$  | 1.827               | 2.484               | 3.3%         | 35.0%       | 1.1%         | 1.1%          |
| $\text{Al}_2\text{Se}_2\text{S-t}$  | 1.691               | 1.777               | 15.6%        | 41.6%       | 6.5%         | 5.9%          |
| $\text{Al}_2\text{SSe}_2\text{-m}$  | 1.765               | 1.474               | 22.4%        | 44.1%       | 9.9%         | 8.4%          |
| $\text{Al}_2\text{Se}_2\text{S-b}$  | 1.553               | 1.254               | 38.0%        | 49.5%       | 18.8%        | 14.3%         |
| $\text{Al}_2\text{Se}_2\text{Te-t}$ | 1.199               | -0.038              | 90.7%        | 42.1%       | 38.2%        | 20.6%         |
| $\text{Al}_2\text{TeSe}_2\text{-m}$ | 1.305               | 0.336               | 78.8%        | 49.9%       | 39.3%        | 25.9%         |
| $\text{Al}_2\text{Se}_2\text{Te-b}$ | 1.865               | 1.632               | 11.4%        | 39.9%       | 4.5%         | 4.3%          |

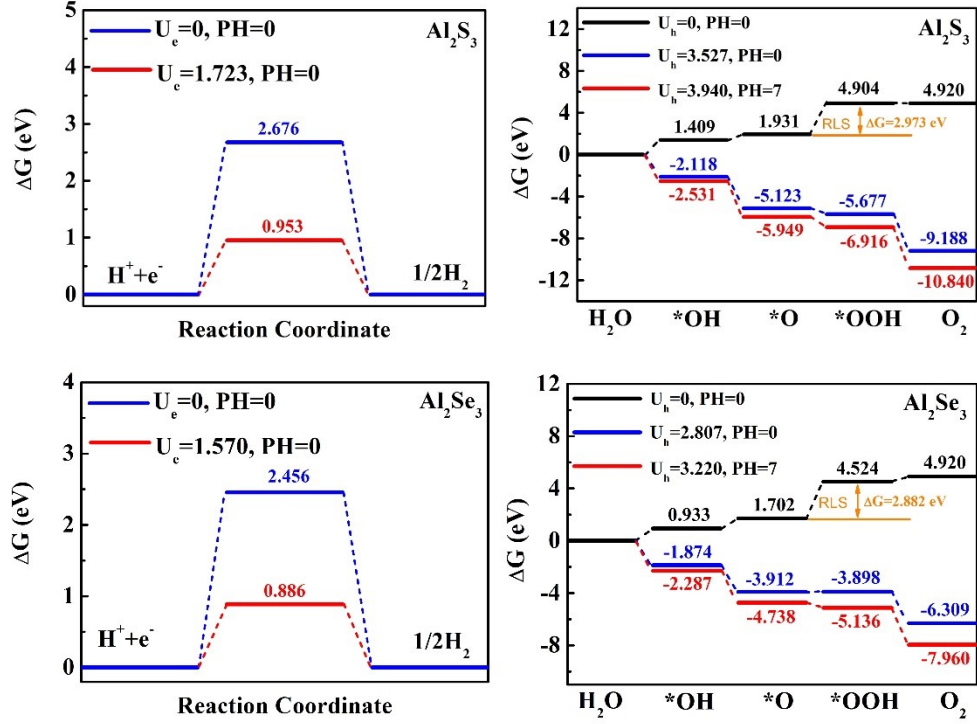

Fig. S10. The Gibbs free energy change diagrams for the OER and HER on the  $\text{Al}_2\text{S}_3$  and  $\text{Al}_2\text{Se}_3$  monolayers.

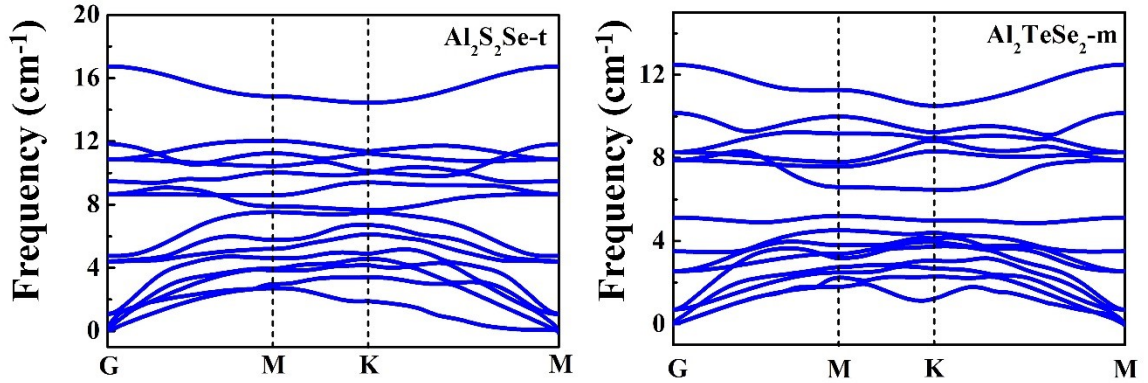

Fig. S11. Phonon band structure of  $\text{Al}_2\text{S}_2\text{Se-t}$  and  $\text{Al}_2\text{TeSe}_2\text{-m}$  monolayers.

Tab. 2. Effective mass  $m_\alpha^*$ , elastic modulus  $C_\alpha$ , deformation potential  $E_\alpha^l$ , and carrier mobility  $\mu_\alpha$  of  $\text{Al}_2\text{S}_2\text{Te-b}$ ,  $\text{Al}_2\text{SeS}_2\text{-m}$ ,  $\text{Al}_2\text{S}_2\text{Se-b}$ ,  $\text{Al}_2\text{Se}_2\text{S-t}$ ,  $\text{Al}_2\text{SSe}_2\text{-m}$ ,  $\text{Al}_2\text{Se}_2\text{S-b}$ ,  $\text{Al}_2\text{Se}_2\text{Te-t}$  and  $\text{Al}_2\text{Se}_2\text{Te-b}$  monolayers.

| Material                           | Direction | $m_\alpha^* (m_e)$ |      | $E_\alpha^l$ (eV) |       | $C_\alpha$ (J/m <sup>2</sup> ) | $\mu_\alpha$ (cm <sup>2</sup> /(s*V)) |       |
|------------------------------------|-----------|--------------------|------|-------------------|-------|--------------------------------|---------------------------------------|-------|
|                                    |           | e                  | h    | e                 | h     | h=e                            | e                                     | h     |
| $\text{Al}_2\text{S}_2\text{Te-b}$ | x         | 0.61               | 0.73 | 2.50              | 11.45 | 161.43                         | 1415.96                               | 50.90 |

|                                         |   |             |             |              |              |               |                |              |
|-----------------------------------------|---|-------------|-------------|--------------|--------------|---------------|----------------|--------------|
|                                         | y | <b>0.65</b> | <b>0.68</b> | <b>3.09</b>  | <b>11.98</b> | <b>176.17</b> | <b>951.44</b>  | <b>54.09</b> |
| <b>Al<sub>2</sub>SeS<sub>2</sub>-m</b>  | x | <b>0.62</b> | <b>6.44</b> | <b>3.69</b>  | <b>8.99</b>  | <b>232.21</b> | <b>1200.39</b> | <b>3.28</b>  |
|                                         | y | <b>0.38</b> | <b>1.31</b> | <b>6.63</b>  | <b>9.92</b>  | <b>241.97</b> | <b>625.72</b>  | <b>13.79</b> |
| <b>Al<sub>2</sub>S<sub>2</sub>Se-b</b>  | x | <b>0.66</b> | <b>2.20</b> | <b>3.21</b>  | <b>6.30</b>  | <b>210.00</b> | <b>1123.81</b> | <b>18.24</b> |
|                                         | y | <b>0.51</b> | <b>3.59</b> | <b>5.73</b>  | <b>7.45</b>  | <b>223.97</b> | <b>493.91</b>  | <b>8.53</b>  |
| <b>Al<sub>2</sub>Se<sub>2</sub>S-t</b>  | x | <b>0.62</b> | <b>8.49</b> | <b>3.78</b>  | <b>8.23</b>  | <b>212.34</b> | <b>1054.75</b> | <b>1.57</b>  |
|                                         | y | <b>0.37</b> | <b>2.95</b> | <b>6.14</b>  | <b>9.46</b>  | <b>222.30</b> | <b>694.38</b>  | <b>3.59</b>  |
| <b>Al<sub>2</sub>SSe<sub>2</sub>-m</b>  | x | <b>0.63</b> | <b>2.32</b> | <b>3.92</b>  | <b>10.12</b> | <b>190.54</b> | <b>849.83</b>  | <b>9.98</b>  |
|                                         | y | <b>0.38</b> | <b>1.26</b> | <b>6.76</b>  | <b>10.75</b> | <b>206.41</b> | <b>513.74</b>  | <b>17.74</b> |
| <b>Al<sub>2</sub>Se<sub>2</sub>S-b</b>  | x | <b>1.05</b> | <b>1.60</b> | <b>3.81</b>  | <b>8.38</b>  | <b>215.23</b> | <b>327.41</b>  | <b>11.98</b> |
|                                         | y | <b>0.81</b> | <b>7.26</b> | <b>7.01</b>  | <b>10.63</b> | <b>225.58</b> | <b>130.85</b>  | <b>1.72</b>  |
| <b>Al<sub>2</sub>Se<sub>2</sub>Te-t</b> | x | <b>0.78</b> | <b>1.48</b> | <b>10.53</b> | <b>11.72</b> | <b>179.12</b> | <b>76.88</b>   | <b>17.25</b> |
|                                         | y | <b>0.42</b> | <b>0.80</b> | <b>11.42</b> | <b>12.37</b> | <b>190.85</b> | <b>130.43</b>  | <b>30.50</b> |
| <b>Al<sub>2</sub>Se<sub>2</sub>Te-b</b> | x | <b>1.10</b> | <b>2.64</b> | <b>3.44</b>  | <b>5.50</b>  | <b>189.11</b> | <b>186.41</b>  | <b>19.21</b> |
|                                         | y | <b>2.52</b> | <b>2.60</b> | <b>5.69</b>  | <b>7.82</b>  | <b>202.25</b> | <b>31.80</b>   | <b>10.33</b> |

## References

- (1) Ferreira, L. G. ; Marques, M. ; Teles, L. K. Slater Half-occupation Technique Revisited: the LDA-1/2 and GGA-1/2 Approaches for Atomic Ionization Energies and Band Gaps in Semiconductors. *AIP Adv.* **2011**, *1*, 0321191-03211911.
- (2) Yao, R. ; Ji, S. ; Zhou, T. ; Quan, C. ; Liu, W. ; Li, X. Self-energy Correction and Numerical Simulation for Efficient Lead-free Double Perovskite Solar Cells. *Phys. Chem. Chem. Phys.* **2024**, *26*, 5253-5261.
- (3) Ferreira, L. G. ; Marques, M. ; Teles, L. K. Approximation to Density Functional Theory for The Calculation of Band Gaps of Semiconductors. *Phys. Rev. B* **2008**, *78*, 125116.
- (4) Traore, B. ; Even, J. ; Pedesseau, L. ; Képénékian, M. ; Katan, C. Band gap, effective masses, and energy level alignment of 2D and 3D halide perovskites and heterostructures using DFT-1/2. *Phys. Rev. Mater.* **2022**, *6*, 014604.
- (5) Li, X. ; Dai, Y. ; Li, M. ; Wei, W. ; Huang, B. Stable Si-based Pentagonal Monolayers: High Carrier Mobilities and Applications in Photocatalytic Water Splitting. *J. Mater. Chem. A* **2015**, *3*, 24055-24063.
- (6) Cai, Y. ; Zhang, G. ; Zhang, Y. W. Polarity-reversed Robust Carrier Mobility in Monolayer MoS<sub>2</sub> Nanoribbons. *J. Am. Chem. Soc.* **2014**, *136*, 6269-6275.
- (7) Xue, K.-H. ; Yuan, J.-H. ; Fonseca, L. R. C. ; Miao, X.-S. Improved LDA-1/2 method for band structure calculations in covalent semiconductors. *Comp. Mater. Sci.* **2018**, *153*, 493-505.
- (8) Guilhon, I. ; Koda, D. S. ; Ferreira, L. G. ; Marques, M. ; Teles, L. K. Approximate Quasiparticle Correction for Calculations of the Energy Gap in Two-dimensional Materials. *Phys. Rev. B* **2018**, *97*, 045426.
